# Supplementary material
Source: PubMed Central journal article supplement (PMC2844103)

**Structure of the 1,*N*<sup>2</sup>-Etheno-2'-deoxyguanosine Lesion in the 3'-G( $\epsilon$ dG)T-5' Sequence Opposite a One-Base Deletion**

**Revised Manuscript**

Ganesh Shanmugam<sup>‡</sup>, Ivan D. Kozekov<sup>‡</sup>, F. Peter Guengerich<sup>||</sup>, Carmelo J. Rizzo<sup>‡</sup>, and Michael P. Stone<sup>\*‡</sup>

**Supporting Information**

Departments of Chemistry and Biochemistry, Vanderbilt Institute of Chemical Biology, Center in Molecular Toxicology, and the Vanderbilt-Ingram Cancer Center, Vanderbilt University, Nashville, Tennessee 37235

<sup>‡</sup>Department of Chemistry

<sup>||</sup>Department of Biochemistry

\*Author to whom correspondence should be addressed. (615) 322-2589; (615) 322-7591 (FAX); michael.p.stone@vanderbilt.edu

**Running Title:** Structure of 1,*N*<sup>2</sup>- $\epsilon$ dG Opposite One-Base Deletion

**Table S1.** Nonexchangeable Proton Chemical Shifts<sup>a</sup> of 1-BD duplex in D<sub>2</sub>O<sup>b</sup> at pH 7.0, 25 °C.

| Nucleotide      | H8   | H6   | H1'  | H2'  | H2'' | H3'  | H5/H2/CH <sub>3</sub> |
|-----------------|------|------|------|------|------|------|-----------------------|
| C <sup>1</sup>  |      | 7.66 | 5.79 | 2.00 | 2.44 | 4.73 | 5.93                  |
| G <sup>2</sup>  | 7.99 |      | 5.93 | 2.70 | 2.78 | 5.01 |                       |
| C <sup>3</sup>  |      | 7.42 | 5.64 | 2.06 | 2.41 | 4.88 | 5.50                  |
| A <sup>4</sup>  | 8.37 |      | 6.21 | 2.67 | 2.87 | 5.03 | 7.71                  |
| T <sup>5</sup>  |      | 7.03 | 5.62 | 1.60 | 1.88 | 4.77 | 1.60                  |
| X <sup>6</sup>  | 7.92 |      | 5.08 | 2.43 | 2.5  | 4.85 |                       |
| G <sup>7</sup>  | 7.83 |      | 5.52 | 2.71 | 2.76 | 4.99 |                       |
| A <sup>8</sup>  | 8.10 |      | 5.92 | 2.71 | 2.85 | 5.05 | 7.27                  |
| A <sup>9</sup>  | 8.13 |      | 6.21 | 2.57 | 2.88 | 4.98 | 7.76                  |
| T <sup>10</sup> | 7.16 |      | 5.92 | 2.05 | 2.47 | 4.85 | 1.31                  |
| C <sup>11</sup> |      | 7.59 | 6.08 | 2.22 | 2.49 | 4.83 | 5.66                  |
| C <sup>12</sup> |      | 7.68 | 6.25 | 2.28 | 2.28 | 4.56 | 5.82                  |
| G <sup>13</sup> | 7.84 |      | 5.65 | 2.48 | 2.68 | 4.81 |                       |
| G <sup>14</sup> | 7.85 |      | 5.65 | 2.70 | 2.82 | 5.01 |                       |
| A <sup>15</sup> | 8.23 |      | 6.31 | 2.68 | 2.95 | 5.05 | 7.88                  |
| T <sup>16</sup> |      | 7.17 | 5.96 | 1.98 | 2.54 | 4.83 | 1.30                  |
| T <sup>17</sup> |      | 7.37 | 6.02 | 2.09 | 2.52 | 4.90 | 1.51                  |
| C <sup>18</sup> |      | 7.63 | 6.02 | 1.94 | 2.00 | 4.98 | 5.71                  |
| A <sup>19</sup> | 8.59 |      | 6.28 | 2.88 | 3.01 | 5.08 | 7.32                  |
| T <sup>20</sup> |      | 7.16 | 5.64 | 2.03 | 2.37 | 4.85 | 1.42                  |
| G <sup>21</sup> | 7.88 |      | 5.85 | 2.62 | 2.68 | 4.97 |                       |
| C <sup>22</sup> |      | 7.34 | 5.77 | 1.90 | 2.37 | 4.81 | 5.43                  |
| G <sup>23</sup> | 7.95 |      | 6.16 | 2.37 | 2.62 | 4.68 |                       |

<sup>a</sup> Values in parts per million. <sup>b</sup> 10 mM phosphate buffer, 100 mM NaCl, pH 7.0. Etheno protons H7 and H6 observed at 5.84 and 5.55 ppm, respectively.

**Table S2.** Non-exchangeable Proton Chemical Shifts<sup>a</sup> of unmodified 1-BD duplex in D<sub>2</sub>O<sup>b</sup> at pH 7.0, 25 °C.

| Nucleotide      | H8   | H6   | H1'  | H2'  | H2'' | H3'  | H5/H2/CH <sub>3</sub> |
|-----------------|------|------|------|------|------|------|-----------------------|
| C <sup>1</sup>  |      | 7.66 | 5.79 | 2.00 | 2.43 | 4.71 | 5.93                  |
| G <sup>2</sup>  | 7.99 |      | 5.95 | 2.70 | 2.78 | 5.00 |                       |
| C <sup>3</sup>  |      | 7.42 | 5.65 | 2.09 | 2.43 | 4.87 | 5.48                  |
| A <sup>4</sup>  | 8.35 |      | 6.24 | 2.68 | 2.88 | 5.03 | 7.71                  |
| T <sup>5</sup>  |      | 7.07 | 5.69 | 1.70 | 2.05 | 4.79 | 1.49                  |
| X <sup>6</sup>  | 7.76 |      | 5.44 | 2.47 | 2.50 | 4.90 |                       |
| G <sup>7</sup>  | 7.71 |      | 5.38 | 2.50 | 2.52 | 4.93 |                       |
| A <sup>8</sup>  | 8.15 |      | 5.89 | 2.74 | 2.84 | 5.03 | 7.29                  |
| A <sup>9</sup>  | 8.12 |      | 6.20 | 2.58 | 2.88 | 4.95 | 7.80                  |
| T <sup>10</sup> |      | 7.19 | 5.95 | 2.07 | 2.48 | 4.85 | 1.29                  |
| C <sup>11</sup> |      | 7.60 | 6.08 | 2.23 | 2.48 | 4.85 | 5.67                  |
| C <sup>12</sup> |      | 7.71 | 6.26 | 2.27 | 2.27 | 4.56 | 5.83                  |
| G <sup>13</sup> | 7.84 |      | 5.65 | 2.48 | 2.66 | 4.81 |                       |
| G <sup>14</sup> | 7.85 |      | 5.65 | 2.70 | 2.82 | 5.03 |                       |
| A <sup>15</sup> | 8.23 |      | 6.31 | 2.70 | 2.95 | 5.05 | 7.91                  |
| T <sup>16</sup> |      | 7.18 | 5.97 | 1.98 | 2.52 | 4.85 | 1.35                  |
| T <sup>17</sup> |      | 7.38 | 6.12 | 2.09 | 2.31 | 4.89 | 1.59                  |
| C <sup>18</sup> |      | 7.63 | -57  | 2.17 | 2.31 | 4.89 | 5.85                  |
| A <sup>19</sup> | 8.41 |      | 6.26 | 2.78 | 2.95 | 5.05 | 7.73                  |
| T <sup>20</sup> |      | 7.13 | 5.69 | 1.98 | 2.35 | 4.85 | 1.49                  |
| G <sup>21</sup> | 7.87 |      | 5.85 | 2.60 | 2.66 | 4.97 |                       |
| C <sup>22</sup> |      | 7.35 | 5.79 | 1.90 | 2.33 | 4.81 | 5.42                  |

---

|                 |      |      |      |      |      |
|-----------------|------|------|------|------|------|
| G <sup>23</sup> | 7.95 | 6.16 | 2.62 | 2.62 | 4.68 |
|-----------------|------|------|------|------|------|

---

<sup>a</sup> Values in parts per million. <sup>b</sup>10 mM phosphate buffer, 100 mM NaCl, pH 7.0.

**Table S3.** Exchangeable Proton Chemical Shifts<sup>a</sup> of Unmodified 1-BD and 1-BD Duplexes in H<sub>2</sub>O<sup>b</sup> at pH 7.0, 7 °C.

| Nucleotide                       | Unmodified 1-BD duplex (X <sup>6</sup> =G <sup>6</sup> ) |        |                                    |                                   | 1-BD duplex (X <sup>6</sup> = 1,N <sup>2</sup> -εdG) |        |                                    |                                   |
|----------------------------------|----------------------------------------------------------|--------|------------------------------------|-----------------------------------|------------------------------------------------------|--------|------------------------------------|-----------------------------------|
|                                  | G(N1H)                                                   | T(N3H) | C(N <sup>4</sup> H) <sub>nbb</sub> | C(N <sup>4</sup> H) <sub>hb</sub> | G(N1H)                                               | T(N3H) | C(N <sup>4</sup> H) <sub>nbb</sub> | C(N <sup>4</sup> H) <sub>hb</sub> |
| G <sup>2</sup> •C <sup>22</sup>  | 13.06                                                    |        | 6.63                               | 8.43                              | 13.06                                                |        | 6.63                               | 8.43                              |
| C <sup>3</sup> •G <sup>21</sup>  | 12.71                                                    |        | 6.51                               | 8.35                              | 12.75                                                |        | 6.55                               | 8.35                              |
| A <sup>4</sup> •T <sup>20</sup>  |                                                          | 13.49  |                                    |                                   |                                                      | 13.45  |                                    |                                   |
| T <sup>5</sup> •A <sup>19</sup>  |                                                          | 13.49  |                                    |                                   |                                                      | 13.33  |                                    |                                   |
| X <sup>6</sup>                   |                                                          |        |                                    |                                   |                                                      |        |                                    |                                   |
| G <sup>7</sup> •C <sup>18</sup>  | 11.68 <sup>c</sup>                                       |        | d                                  | d                                 | 11.79                                                |        | 6.78                               | 7.72                              |
| A <sup>8</sup> •T <sup>17</sup>  |                                                          | 13.67  |                                    |                                   |                                                      | 13.69  |                                    |                                   |
| A <sup>9</sup> •T <sup>16</sup>  |                                                          | 13.59  |                                    |                                   |                                                      | 13.67  |                                    |                                   |
| T <sup>10</sup> •A <sup>15</sup> |                                                          | 13.57  |                                    |                                   |                                                      | 13.57  |                                    |                                   |
| C <sup>11</sup> •G <sup>14</sup> | 12.79                                                    |        | 6.90                               | 8.39                              | 12.77                                                |        | 6.90                               | 8.39                              |

<sup>a</sup>Values in parts per million. <sup>b</sup>10 mM phosphate buffer in H<sub>2</sub>O, 100 mM NaCl, pH 7.0. nh and hb and nbb refer to the hydrogen bond and non-hydrogen bonded cytidine amino protons, respectively. <sup>c</sup>G<sup>7</sup> imino proton was broad. <sup>d</sup>C<sup>18</sup> amino protons were broadened.

**Figure S1.** The partial charges assigned to the 1,*N*<sup>2</sup>-εdG adduct, calculated using the RESP protocol.

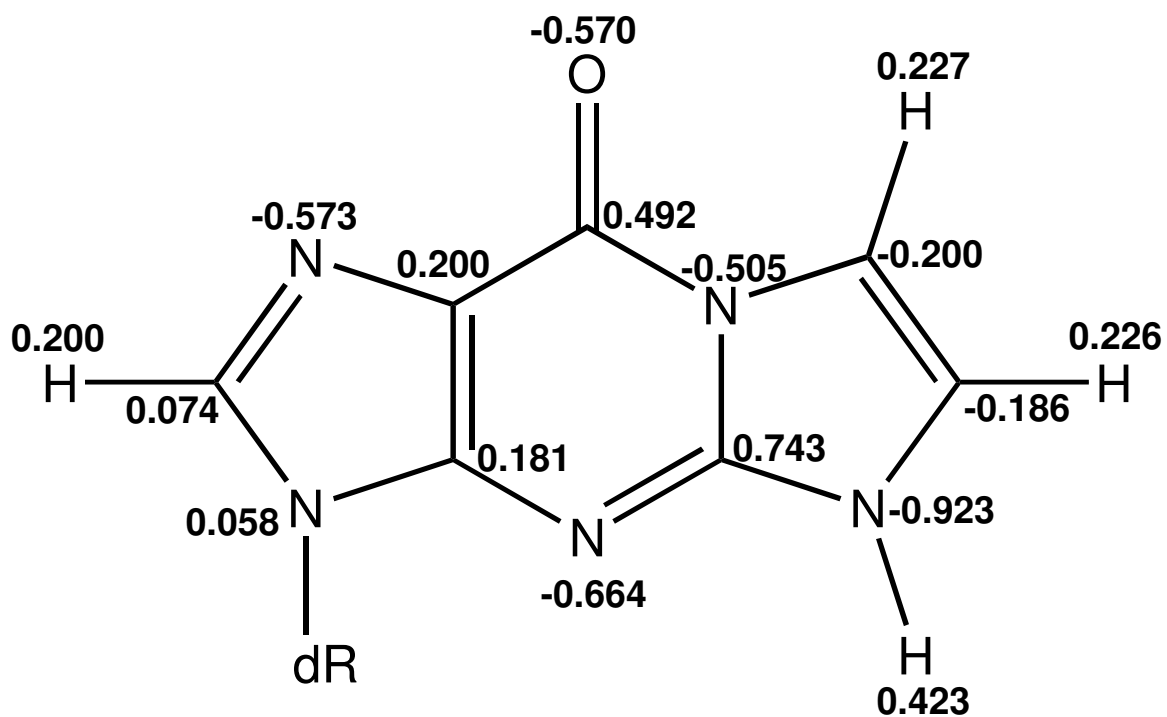

**Figure S2.** Proton-decoupled  $^{31}\text{P}$  NMR spectrum of the 1-BD duplex. Labeled peak  $G^7$  was identified from the two-dimensional  $\text{H}3'-^{31}\text{P}$  spectrum showing cross-peak for  $X^6 \text{H}3' - G^7 ^{31}\text{P}$ . The spectrum was recorded at 25 °C in 10 mM  $\text{NaH}_2\text{PO}_4$ , 100 mM NaCl, and 5  $\mu\text{M}$   $\text{Na}_2\text{EDTA}$  (pH 7).

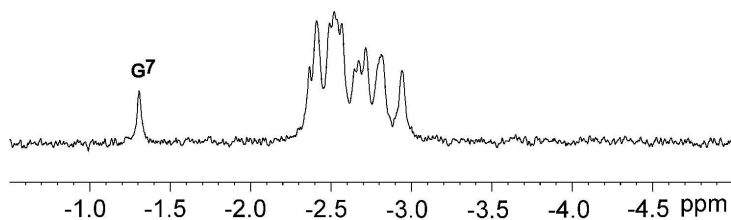



**Figure S3.** Superposition of structures emergent from rMD calculations for the 1-BD duplex. A. Using a B-form DNA starting structure. B. Using A-form DNA starting structure.

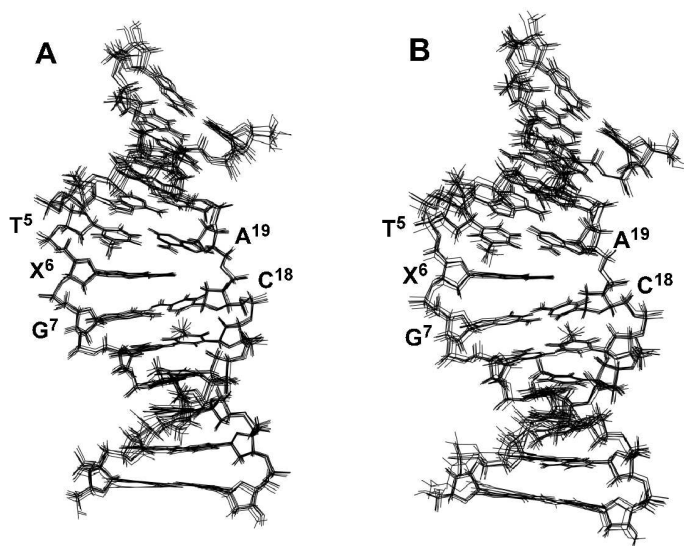

**Figure S4.** Intra- (black) and inter-nucleotide (gray) sixth root  $R_1^x$  factors as a function of nucleotide position in the 1-BD duplex. A. The modified strand. B. The complimentary strand.

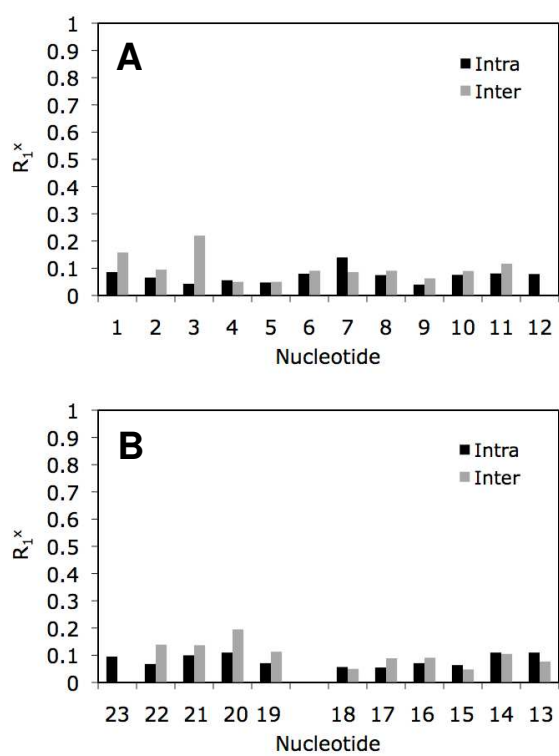

Supplement: bi901516d_si_001.pdf [file bi901516d_si_001.pdf]
